# Supplementary material
Source: PubMed Central journal article supplement (PMC2800262)
Supplement: kwp304_2.pdf [file kwp304_2.pdf]

**WEB APPENDIX TABLE 1.** Predictors of Mammography Screening in the Next 2 Years in the Nurses' Health Study, by Year

|                                   |               | 1988<br>( 34754 / 43312 Screened ) |              |         | 1990<br>( 30269 / 30269 Screened ) |             |         | 1992<br>( 35863 / 42091 Screened ) |             |         | 1994<br>( 32386 / 37223 Screened ) |             |         | 1996<br>( 38520 / 42860 Screened ) |              |         | 1998<br>( 37114 / 39652 Screened ) |              |         |         |
|-----------------------------------|---------------|------------------------------------|--------------|---------|------------------------------------|-------------|---------|------------------------------------|-------------|---------|------------------------------------|-------------|---------|------------------------------------|--------------|---------|------------------------------------|--------------|---------|---------|
|                                   |               | OR                                 | 95% CI       | p       | OR                                 | 95% CI      | p       | OR                                 | 95% CI      | p       | OR                                 | 95% CI      | p       | OR                                 | 95% CI       | p       | OR                                 | 95% CI       | p       |         |
| Age<br>(years)                    | 40-44         | 0.752                              | 0.669-0.845  | <0.0001 | 0.662                              | 0.561-0.782 | <0.0001 | NA                                 | NA          | NA      | NA                                 | NA          | NA      | NA                                 | NA           | NA      | NA                                 | NA           | NA      | NA      |
|                                   | 45-49         | 0.962                              | 0.862-1.074  | 0.4894  | 0.847                              | 0.745-0.963 | 0.0114  | 0.773                              | 0.678-0.880 | <0.0001 | 0.749                              | 0.639-0.878 | 0.0004  | 1.016                              | 0.726-1.423  | 0.9252  | NA                                 | NA           | NA      | NA      |
|                                   | 50-54         | 1.000                              | NA           | NA      | 1.000                              | NA          | NA      | 1.000                              | NA          | NA      | 1.000                              | NA          | NA      | 1.000                              | NA           | NA      | 1.000                              | NA           | NA      | NA      |
|                                   | 55-59         | 0.919                              | 0.843-1.003  | 0.0589  | 0.854                              | 0.773-0.943 | 0.0019  | 0.950                              | 0.856-1.055 | 0.3401  | 0.866                              | 0.774-0.969 | 0.0119  | 1.013                              | 0.895-1.146  | 0.8392  | 0.984                              | 0.834-1.161  | 0.8448  | 0.8448  |
|                                   | 60-64         | 0.508                              | 0.449-0.575  | <0.0001 | 0.441                              | 0.382-0.509 | <0.0001 | 0.395                              | 0.339-0.459 | <0.0001 | 0.393                              | 0.332-0.466 | <0.0001 | 0.382                              | 0.310-0.472  | <0.0001 | 0.387                              | 0.277-0.541  | <0.0001 | <0.0001 |
|                                   | 65-69         | 0.484                              | 0.419-0.559  | <0.0001 | 0.382                              | 0.329-0.443 | <0.0001 | 0.335                              | 0.288-0.390 | <0.0001 | 0.416                              | 0.351-0.495 | <0.0001 | 0.381                              | 0.309-0.471  | <0.0001 | 0.411                              | 0.293-0.575  | <0.0001 | <0.0001 |
|                                   | 70-74         | NA                                 | NA           | NA      | 0.293                              | 0.087-0.987 | 0.0475  | 0.291                              | 0.241-0.351 | <0.0001 | 0.356                              | 0.295-0.428 | <0.0001 | 0.300                              | 0.243-0.371  | <0.0001 | 0.378                              | 0.270-0.530  | <0.0001 | <0.0001 |
| 75+                               | NA            | NA                                 | NA           | NA      | NA                                 | NA          | NA      | NA                                 | NA          | NA      | NA                                 | NA          | 0.209   | 0.155-0.282                        | NA           | 0.277   | 0.194-0.395                        | <0.0001      | <0.0001 |         |
| Menopausal x age*<br>(years)      | 40-49         | 0.569                              | 0.493-0.657  | <0.0001 | 0.499                              | 0.421-0.591 | <0.0001 | 0.526                              | 0.430-0.643 | <0.0001 | 0.427                              | 0.327-0.557 | <0.0001 | 0.483                              | 0.251-0.927  | 0.0288  | NA                                 | NA           | NA      | NA      |
|                                   | 50-59         | 0.586                              | 0.516-0.665  | <0.0001 | 0.496                              | 0.428-0.576 | <0.0001 | 0.412                              | 0.353-0.482 | <0.0001 | 0.425                              | 0.358-0.506 | <0.0001 | 0.376                              | 0.303-0.467  | <0.0001 | 0.361                              | 0.257-0.506  | <0.0001 | <0.0001 |
| Bilateral Oophorectomy            |               | 0.759                              | 0.693-0.831  | <0.0001 | 0.765                              | 0.691-0.847 | <0.0001 | 0.720                              | 0.650-0.797 | <0.0001 | 0.816                              | 0.728-0.916 | 0.0005  | 0.784                              | 0.699-0.879  | <0.0001 | 0.793                              | 0.685-0.918  | 0.002   | 0.002   |
| Hormone Therapy                   | Never         | 1.000                              | NA           | NA      | 1.000                              | NA          | NA      | 1.000                              | NA          | NA      | 1.000                              | NA          | NA      | 1.000                              | NA           | NA      | 1.000                              | NA           | NA      | NA      |
|                                   | Current E+P   | 4.840                              | 4.163-5.627  | <0.0001 | 5.470                              | 4.712-6.351 | <0.0001 | 6.908                              | 5.958-8.009 | <0.0001 | 7.814                              | 6.722-9.084 | <0.0001 | 8.526                              | 7.263-10.009 | <0.0001 | 8.500                              | 6.910-10.454 | <0.0001 | <0.0001 |
|                                   | Current E     | 2.673                              | 2.384-2.998  | <0.0001 | 2.989                              | 2.628-3.399 | <0.0001 | 3.769                              | 3.307-4.296 | <0.0001 | 3.790                              | 3.270-4.391 | <0.0001 | 4.400                              | 3.789-5.109  | <0.0001 | 6.759                              | 5.493-8.317  | <0.0001 | <0.0001 |
|                                   | Current Other | 3.440                              | 2.869-4.126  | <0.0001 | 3.616                              | 2.986-4.378 | <0.0001 | 5.120                              | 4.314-6.076 | <0.0001 | 5.133                              | 4.363-6.039 | <0.0001 | 6.414                              | 5.451-7.547  | <0.0001 | 6.891                              | 5.751-8.255  | <0.0001 | <0.0001 |
|                                   | Past E+P      | 2.213                              | 1.763-2.779  | <0.0001 | 2.575                              | 2.110-3.142 | <0.0001 | 2.687                              | 2.236-3.229 | <0.0001 | 2.514                              | 2.121-2.980 | <0.0001 | 2.600                              | 2.192-3.084  | <0.0001 | 2.401                              | 1.963-2.936  | <0.0001 | <0.0001 |
|                                   | Past E        | 1.367                              | 1.220-1.531  | <0.0001 | 1.385                              | 1.221-1.571 | <0.0001 | 1.501                              | 1.325-1.702 | <0.0001 | 1.441                              | 1.252-1.660 | <0.0001 | 1.554                              | 1.351-1.787  | <0.0001 | 1.572                              | 1.319-1.873  | <0.0001 | <0.0001 |
|                                   | Past Other    | 1.388                              | 1.247-1.544  | <0.0001 | 1.570                              | 1.394-1.768 | <0.0001 | 1.702                              | 1.518-1.908 | <0.0001 | 1.609                              | 1.421-1.823 | <0.0001 | 1.694                              | 1.506-1.906  | <0.0001 | 1.726                              | 1.498-1.989  | <0.0001 | <0.0001 |
| Parity                            | 0-1           | 1.000                              | NA           | NA      | 1.000                              | NA          | NA      | 1.000                              | NA          | NA      | 1.000                              | NA          | NA      | 1.000                              | NA           | NA      | 1.000                              | NA           | NA      | NA      |
|                                   | 2             | 1.221                              | 1.124-1.325  | <0.0001 | 1.228                              | 1.119-1.347 | <0.0001 | 1.319                              | 1.201-1.449 | <0.0001 | 1.121                              | 1.006-1.249 | 0.0385  | 1.386                              | 1.243-1.544  | <0.0001 | 1.373                              | 1.194-1.578  | <0.0001 | <0.0001 |
|                                   | 3+            | 1.144                              | 1.062-1.233  | 0.0003  | 1.188                              | 1.092-1.293 | <0.0001 | 1.247                              | 1.145-1.357 | <0.0001 | 1.112                              | 1.007-1.228 | 0.0353  | 1.375                              | 1.248-1.516  | <0.0001 | 1.270                              | 1.122-1.438  | 0.0002  | 0.0002  |
| Body Mass Index<br>(kg/m2)        | <25           | 1.000                              | NA           | NA      | 1.000                              | NA          | NA      | 1.000                              | NA          | NA      | 1.000                              | NA          | NA      | 1.000                              | NA           | NA      | 1.000                              | NA           | NA      | NA      |
|                                   | 25-29         | 0.943                              | 0.847-1.049  | 0.2826  | 0.905                              | 0.789-1.038 | 0.1523  | 0.881                              | 0.752-1.031 | 0.1147  | 0.919                              | 0.754-1.120 | 0.4032  | 0.878                              | 0.660-1.167  | 0.3707  | 0.949                              | 0.579-1.555  | 0.8344  | 0.8344  |
|                                   | 30+           | 0.728                              | 0.658-0.806  | <0.0001 | 0.634                              | 0.557-0.723 | <0.0001 | 0.762                              | 0.660-0.881 | 0.0002  | 0.786                              | 0.653-0.946 | 0.0108  | 0.692                              | 0.533-0.898  | 0.0056  | 0.600                              | 0.393-0.916  | 0.0178  | 0.0178  |
| BMI*Menopause                     | 25-29*Meno    | 1.060                              | 0.930-1.209  | 0.3795  | 1.113                              | 0.950-1.304 | 0.1854  | 1.180                              | 0.989-1.408 | 0.0658  | 1.145                              | 0.924-1.420 | 0.2158  | 1.184                              | 0.880-1.593  | 0.27    | 1.099                              | 0.664-1.821  | 0.7127  | 0.7127  |
|                                   | 30+*Meno      | 1.216                              | 1.074-1.1377 | 0.002   | 1.337                              | 1.148-1.558 | 0.0002  | 1.175                              | 0.999-1.382 | 0.0513  | 1.165                              | 0.952-1.427 | 0.1382  | 1.358                              | 1.035-1.783  | 0.0274  | 1.711                              | 1.109-2.638  | 0.0152  | 0.0152  |
| Smoking                           | Never         | 1.000                              | NA           | NA      | 1.000                              | NA          | NA      | 1.000                              | NA          | NA      | 1.000                              | NA          | NA      | 1.000                              | NA           | NA      | 1.000                              | NA           | NA      | NA      |
|                                   | Past          | 1.030                              | 0.972-1.091  | 0.3183  | 1.032                              | 0.967-1.102 | 0.3377  | 1.058                              | 0.991-1.129 | 0.0911  | 0.989                              | 0.920-1.064 | 0.7715  | 1.008                              | 0.934-1.087  | 0.8399  | 1.047                              | 0.951-1.151  | 0.3492  | 0.3492  |
|                                   | Current       | 0.719                              | 0.640-0.809  | <0.0001 | 0.701                              | 0.612-0.802 | <0.0001 | 0.737                              | 0.642-0.847 | <0.0001 | 0.649                              | 0.555-0.760 | <0.0001 | 0.692                              | 0.586-0.817  | <0.0001 | 0.731                              | 0.590-0.906  | 0.0042  | 0.0042  |
| Cigarettes/Day                    |               | 0.985                              | 0.980-0.990  | <0.0001 | 0.979                              | 0.974-0.985 | <0.0001 | 0.976                              | 0.970-0.983 | <0.0001 | 0.980                              | 0.973-0.988 | <0.0001 | 0.978                              | 0.970-0.986  | <0.0001 | 0.974                              | 0.964-0.984  | <0.0001 | <0.0001 |
| Alcohol Use<br>(drinks/day)       | None          | 1.000                              | NA           | NA      | 1.000                              | NA          | NA      | 1.000                              | NA          | NA      | 1.000                              | NA          | NA      | 1.000                              | NA           | NA      | 1.000                              | NA           | NA      | NA      |
|                                   | 0-1           | 1.272                              | 1.202-1.346  | <0.0001 | 1.327                              | 1.246-1.412 | <0.0001 | 1.250                              | 1.173-1.332 | <0.0001 | 1.183                              | 1.102-1.271 | <0.0001 | 1.212                              | 1.125-1.306  | <0.0001 | 1.237                              | 1.124-1.361  | <0.0001 | <0.0001 |
|                                   | 1+            | 1.301                              | 1.213-1.397  | <0.0001 | 1.342                              | 1.234-1.460 | <0.0001 | 1.264                              | 1.162-1.376 | <0.0001 | 1.234                              | 1.122-1.358 | <0.0001 | 1.210                              | 1.096-1.336  | 0.0002  | 1.258                              | 1.110-1.427  | 0.0003  | 0.0003  |
| Physical Activity<br>(MET hrs/wk) | <10           | 1.000                              | NA           | NA      | 1.000                              | NA          | NA      | 1.000                              | NA          | NA      | 1.000                              | NA          | NA      | 1.000                              | NA           | NA      | 1.000                              | NA           | NA      | NA      |
|                                   | 10 to 19      | 1.111                              | 1.039-1.187  | 0.002   | 1.140                              | 1.057-1.230 | 0.0007  | 1.193                              | 1.106-1.287 | <0.0001 | 1.204                              | 1.106-1.310 | <0.0001 | 1.139                              | 1.042-1.244  | 0.004   | 1.146                              | 1.024-1.284  | 0.0181  | 0.0181  |
|                                   | 20+           | 1.124                              | 1.059-1.193  | <0.0001 | 1.091                              | 1.020-1.167 | 0.0112  | 1.128                              | 1.056-1.206 | 0.0004  | 1.189                              | 1.105-1.282 | <0.0001 | 1.131                              | 1.045-1.225  | 0.0023  | 1.073                              | 0.970-1.187  | 0.1712  | 0.1712  |
| Multivitamin Use                  |               | 1.017                              | 0.964-1.073  | 0.547   | 1.006                              | 0.946-1.070 | 0.85    | 1.019                              | 0.959-1.082 | 0.5453  | 1.035                              | 0.969-1.107 | 0.31    | 0.984                              | 0.918-1.054  | 0.64    | 1.101                              | 1.010-1.201  | 0.0297  | 0.0297  |
| Calcium Supplement Use            |               | 1.448                              | 1.370-1.531  | <0.0001 | 1.425                              | 1.333-1.524 | <0.0001 | 1.402                              | 1.310-1.501 | <0.0001 | 1.454                              | 1.354-1.562 | <0.0001 | 1.498                              | 1.394-1.609  | <0.0001 | 1.602                              | 1.464-1.754  | <0.0001 | <0.0001 |
| Aspirin Use                       |               | 0.937                              | 0.875-1.003  | 0.0612  | 1.017                              | 0.941-1.100 | 0.6659  | 1.015                              | 0.943-1.091 | 0.6953  | 1.044                              | 0.970-1.125 | 0.25    | 1.029                              | 0.955-1.110  | 0.4502  | 1.128                              | 1.027-1.240  | 0.0122  | 0.0122  |
| Benign Breast Disease             |               | 1.904                              | 1.800-2.014  | <0.0001 | 1.927                              | 1.809-2.052 | <0.0001 | 2.042                              | 1.918-2.174 | <0.0001 | 1.962                              | 1.831-2.103 | <0.0001 | 1.992                              | 1.853-2.142  | <0.0001 | 1.810                              | 1.653-1.983  | <0.0001 | <0.0001 |
| Family History of Breast Cancer   |               | 1.568                              | 1.433-1.715  | <0.0001 | 1.555                              | 1.403-1.725 | <0.0001 | 1.442                              | 1.313-1.584 | <0.0001 | 1.360                              | 1.224-1.511 | <0.0001 | 1.451                              | 1.307-1.610  | <0.0001 | 1.345                              | 1.181-1.531  | <0.0001 | <0.0001 |
| Family History of Other Cancer    |               | 1.102                              | 1.048-1.160  | 0.0002  | 1.084                              | 1.023-1.148 | 0.0066  | 1.117                              | 1.052-1.185 | 0.0003  | 1.117                              | 1.044-1.195 | 0.0013  | 1.059                              | 0.987-1.135  | 0.1089  | 1.128                              | 1.032-1.233  | 0.0081  | 0.0081  |
| History of Hypertension           |               | 1.099                              | 1.034-1.168  | 0.0024  | 1.163                              | 1.087-1.245 | <0.0001 | 1.211                              | 1.132-1.294 | <0.0001 | 1.210                              | 1.124-1.303 | <0.0001 | 1.244                              | 1.155-1.341  | <0.0001 | 1.382                              | 1.257-1.519  | <0.0001 | <0.0001 |
| History of High Cholesterol       |               | 1.594                              | 1.493-1.701  | <0.0001 | 1.620                              | 1.520-1.726 | <0.0001 | 1.640                              | 1.542-1.745 | <0.0001 | 1.536                              | 1.435-1.644 | <0.0001 | 1.689                              | 1.575-1.811  | <0.0001 | 1.651                              | 1.511-1.803  | <0.0001 | <0.0001 |
| History of Cardiovascular Disease |               | 0.959                              | 0.883-1.042  | 0.3207  | 0.867                              | 0.794-0.947 | 0.0016  | 0.867                              | 0.795-0.945 | 0.0012  | 0.840                              | 0.764-0.924 | 0.0003  | 0.858                              | 0.780-0.944  | 0.0016  | 0.805                              | 0.715-0.906  | 0.0003  | 0.0003  |
| History of Rheumatoid Arthritis   |               | 0.908                              | 0.815-1.013  | 0.0836  | 0.954                              | 0.848-1.074 | 0.4393  | 0.952                              | 0.849-1.067 | 0.3944  | 0.993                              | 0.868-1.137 | 0.9214  | 0.965                              | 0.855-1.090  | 0.57    | 0.975                              |              |         |         |
